# Supplementary material for: Identification of imprinted genes subject to parent-of-origin specific expression in Arabidopsis thalianaseeds
Source: Springer Nature journal article supplement (doi:10.1186/1471-2229-11-113), 2011-08-12
Supplement: Additional file 1 [file 1471-2229-11-113-s1.doc]

| **Gene** | **Organism** | **Maternally or paternally expressed imprinted gene?** | **Reference** |
| --- | --- | --- | --- |
| *MEDEA* | Arabidopsis | Maternally | Vielle-Calzada et al., 1999 |
| *FIS2* | Arabidopsis | Maternally | Jullien et al., 2006 |
| *PHE1* | Arabidopsis | Paternally | Köhler et al., 2004 |
| *FWA* | Arabidopsis | Maternally | Kinoshita et al., 2004 |
| *MPC* | Arabidopsis | Maternally | Tiwari et al., 2008 |
| *HDG3* | Arabidopsis | Paternally | Gehring et al., 2009 |
| *HDG8* | Arabidopsis | Maternally | Gehring et al., 2009 |
| *HDG9* | Arabidopsis | Maternally | Gehring et al., 2009 |
| At5g62110 | Arabidopsis | Maternally | Gehring et al., 2009 |
| At*MYB3R2* | Arabidopsis | Paternally | Gehring et al., 2009 |
| At*FH5* | Arabidopsis | Maternally | Gerald et al., 2009 |
| Os*FIE* | Rice | Maternally | Luo et al., 2009 |
| *Npr1* | Maize | Maternally | Guo et al., 2003 |
| *Meg1* | Maize | Maternally | Gutierrez-Marcos et al., 2004 |
| *Fie1* | Maize | Maternally | Gutierrez-Marcos et al., 2006 |
| *Fie2* | Maize | Maternally | Gutierrez-Marcos et al., 2006 |
| *Mez1* | Maize | Maternally | Haun et al., 2007 |
| *Mee1* | Maize | Maternally | Jahnke and Scholten, 2009 |
