# Supplementary figures and images for: Identification of imprinted genes subject to parent-of-origin specific expression in Arabidopsis thalianaseeds
Source: Springer Nature journal article supplement (doi:10.1186/1471-2229-11-113), 2011-08-12

# AT1G03070

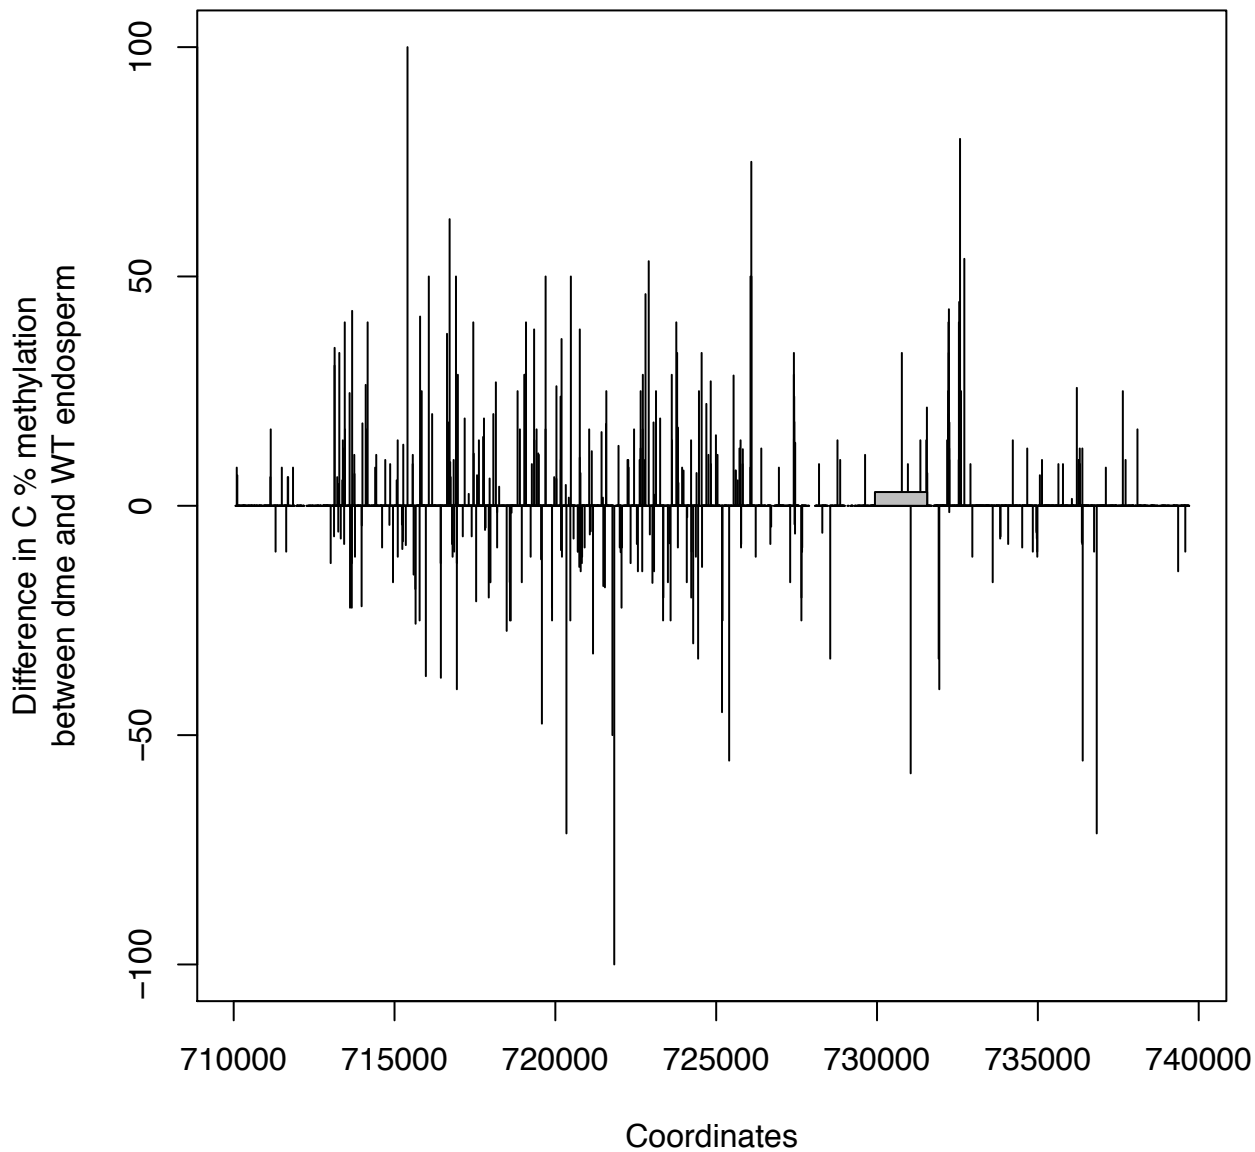

# AT1G25370

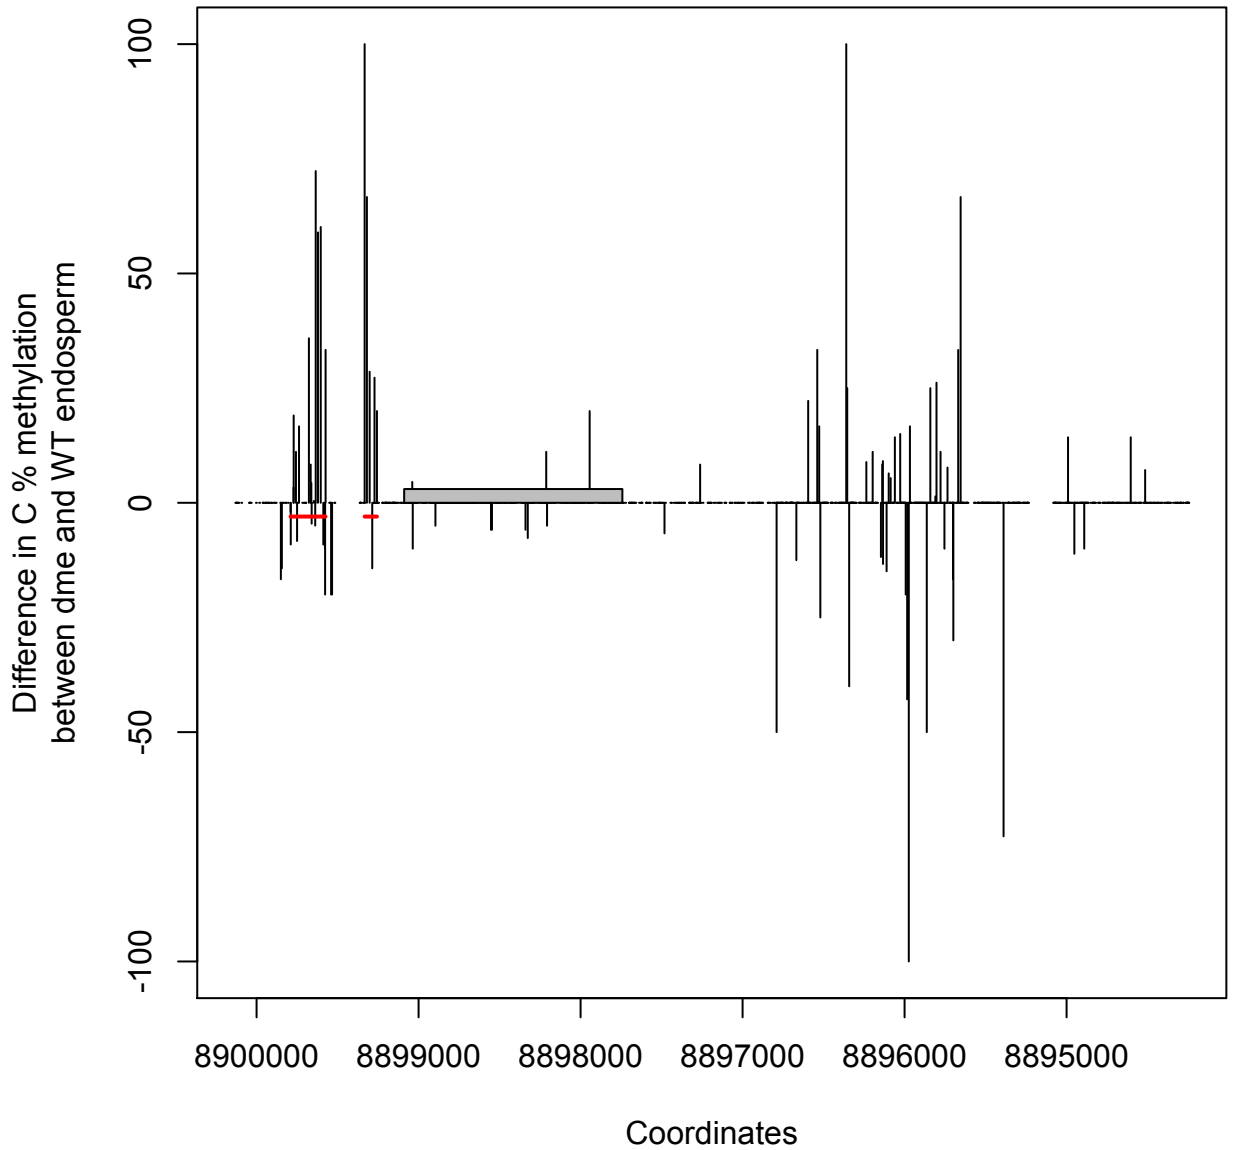

# AT1G61990

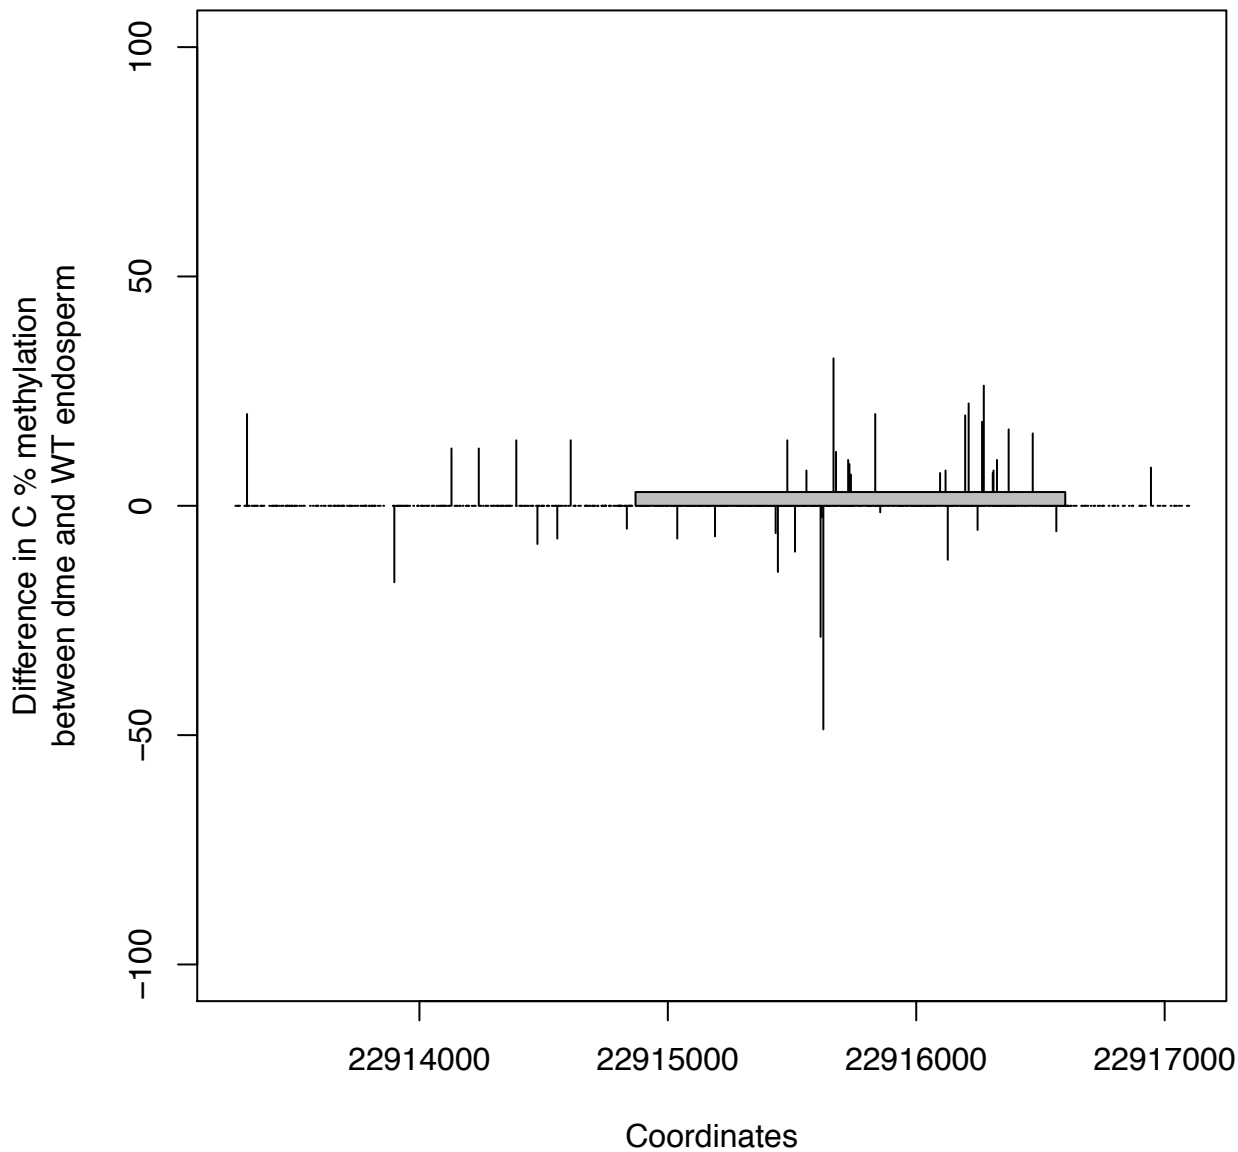

# AT1G65820

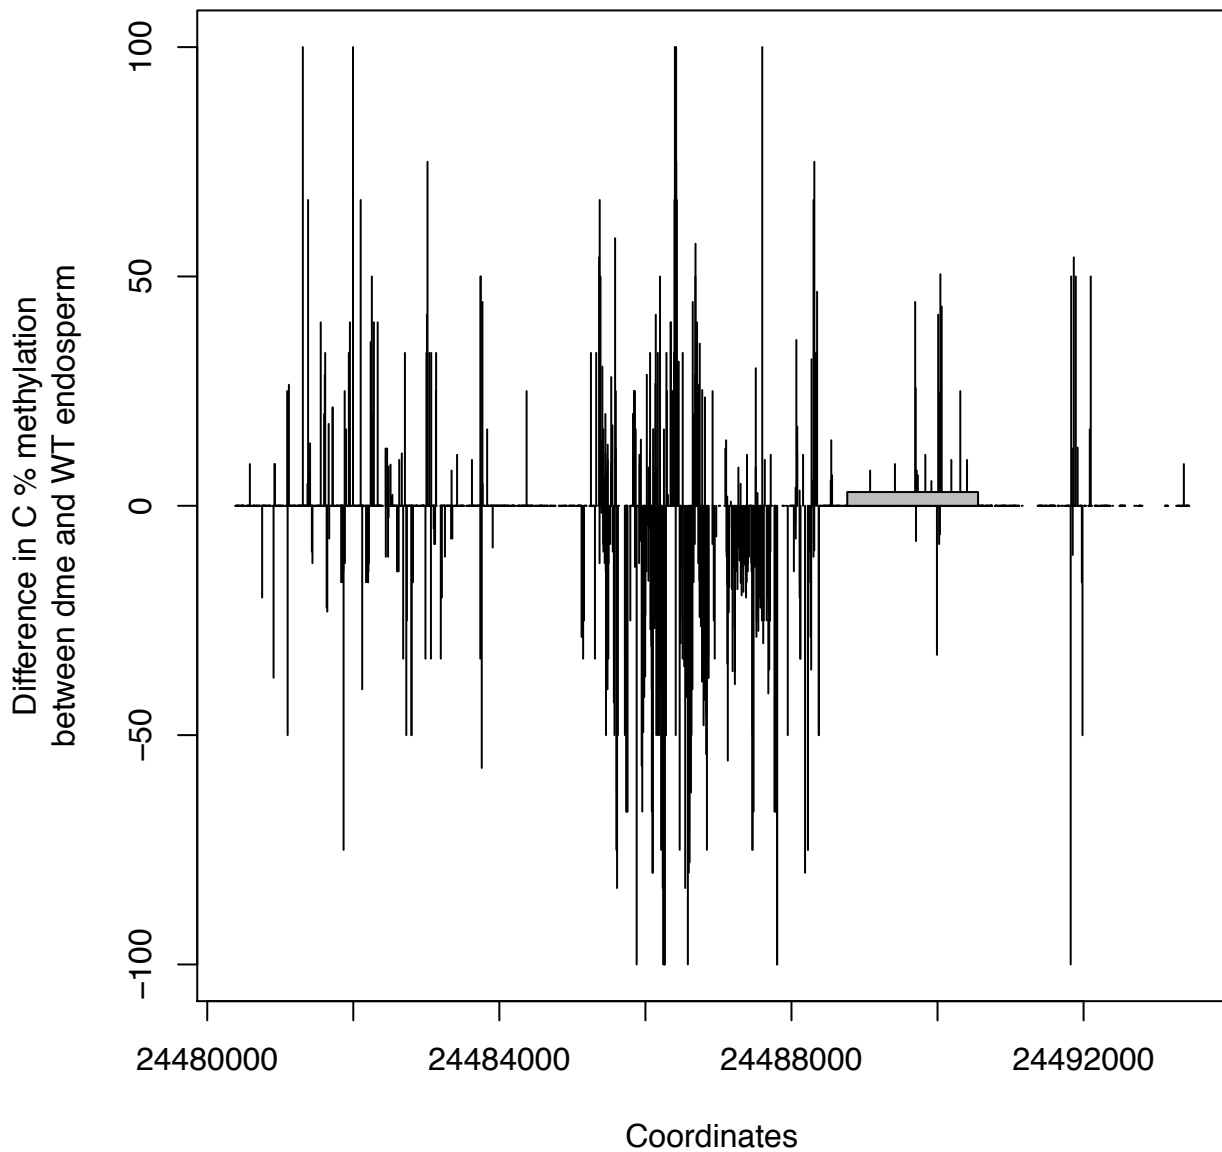

# AT1G73680

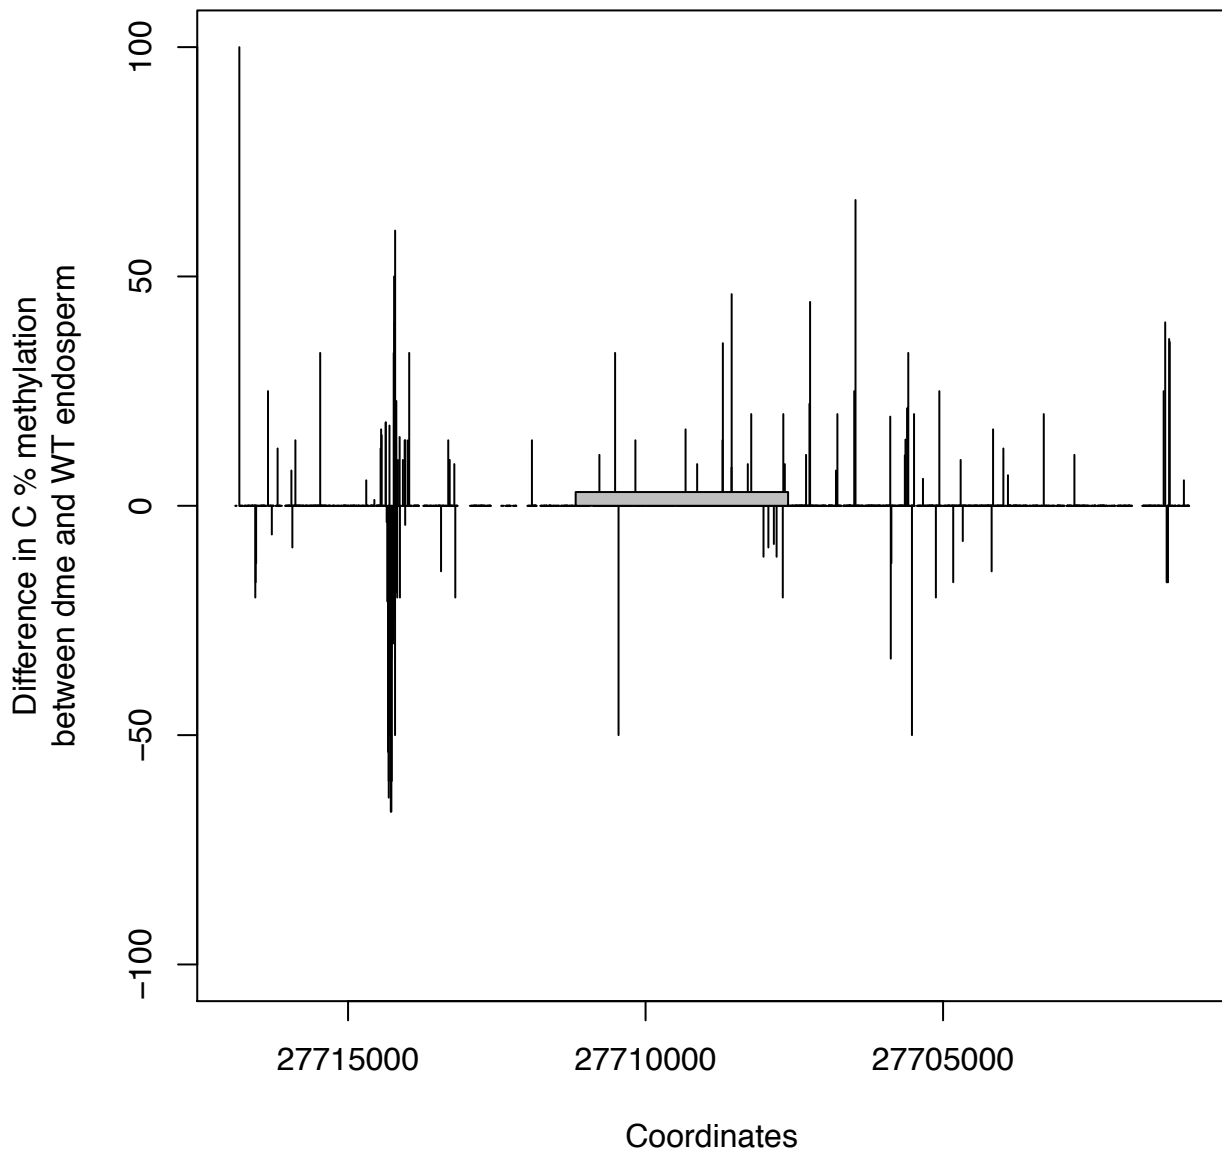

# AT2G16480

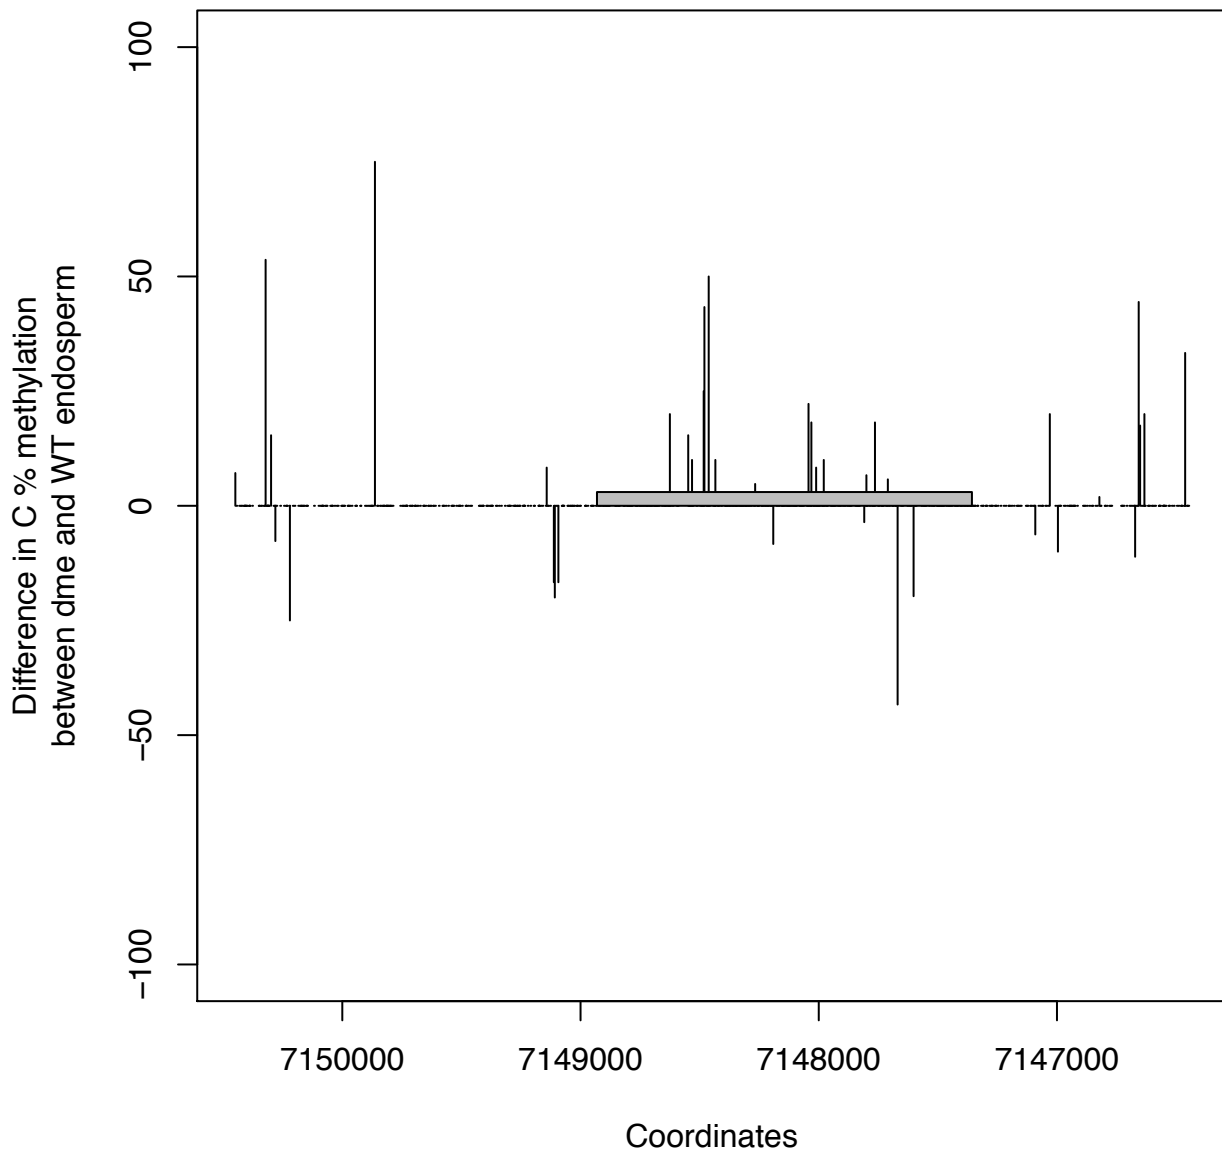

# AT2G31510

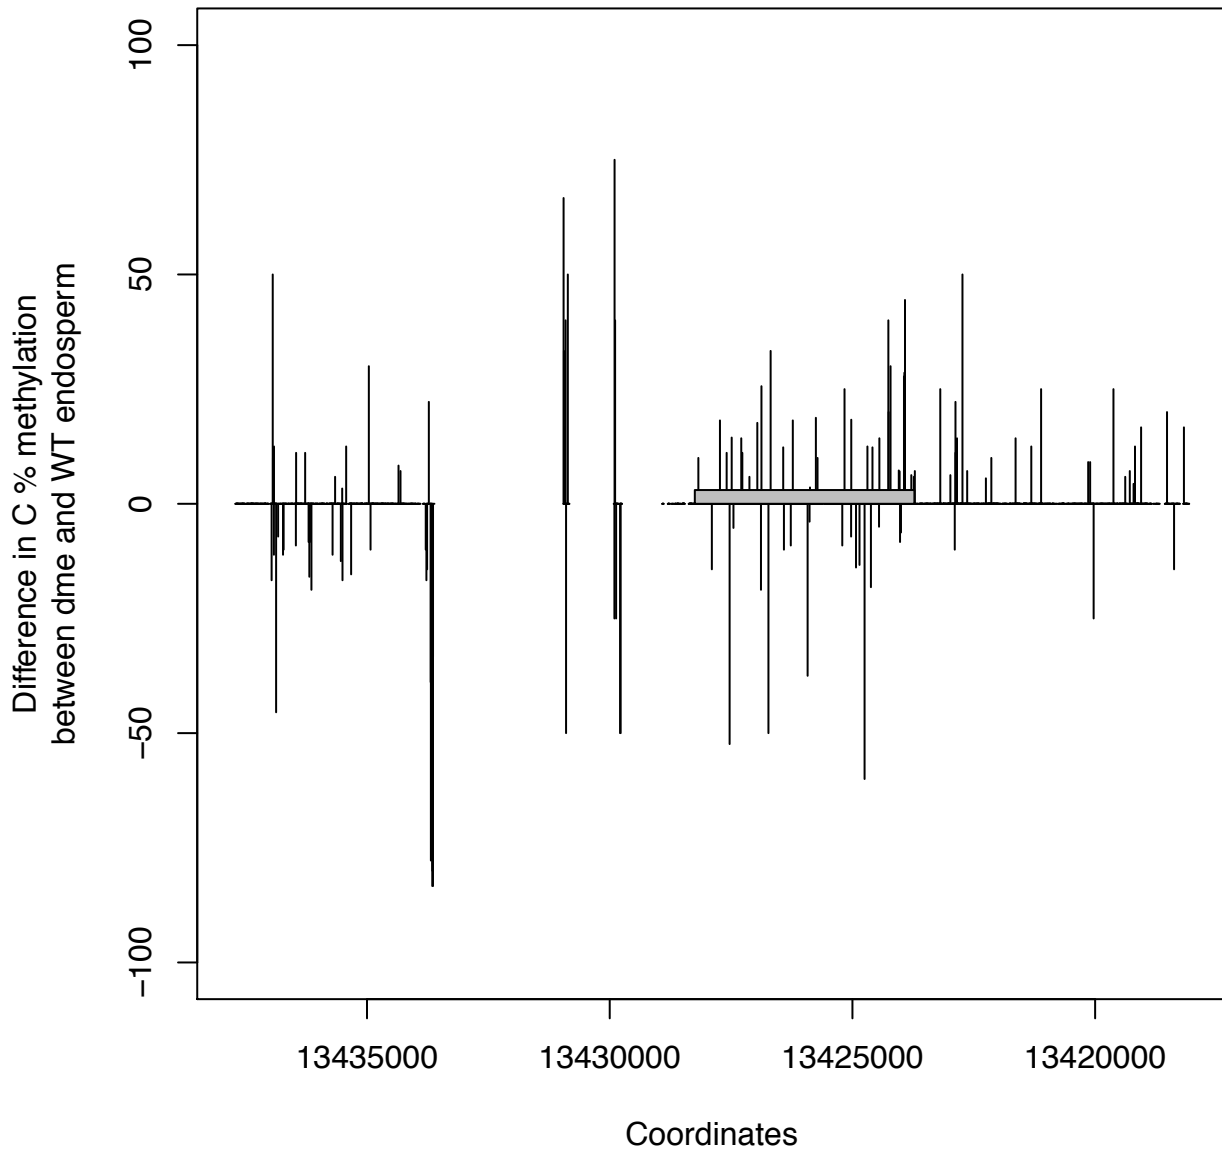

# AT2G32000

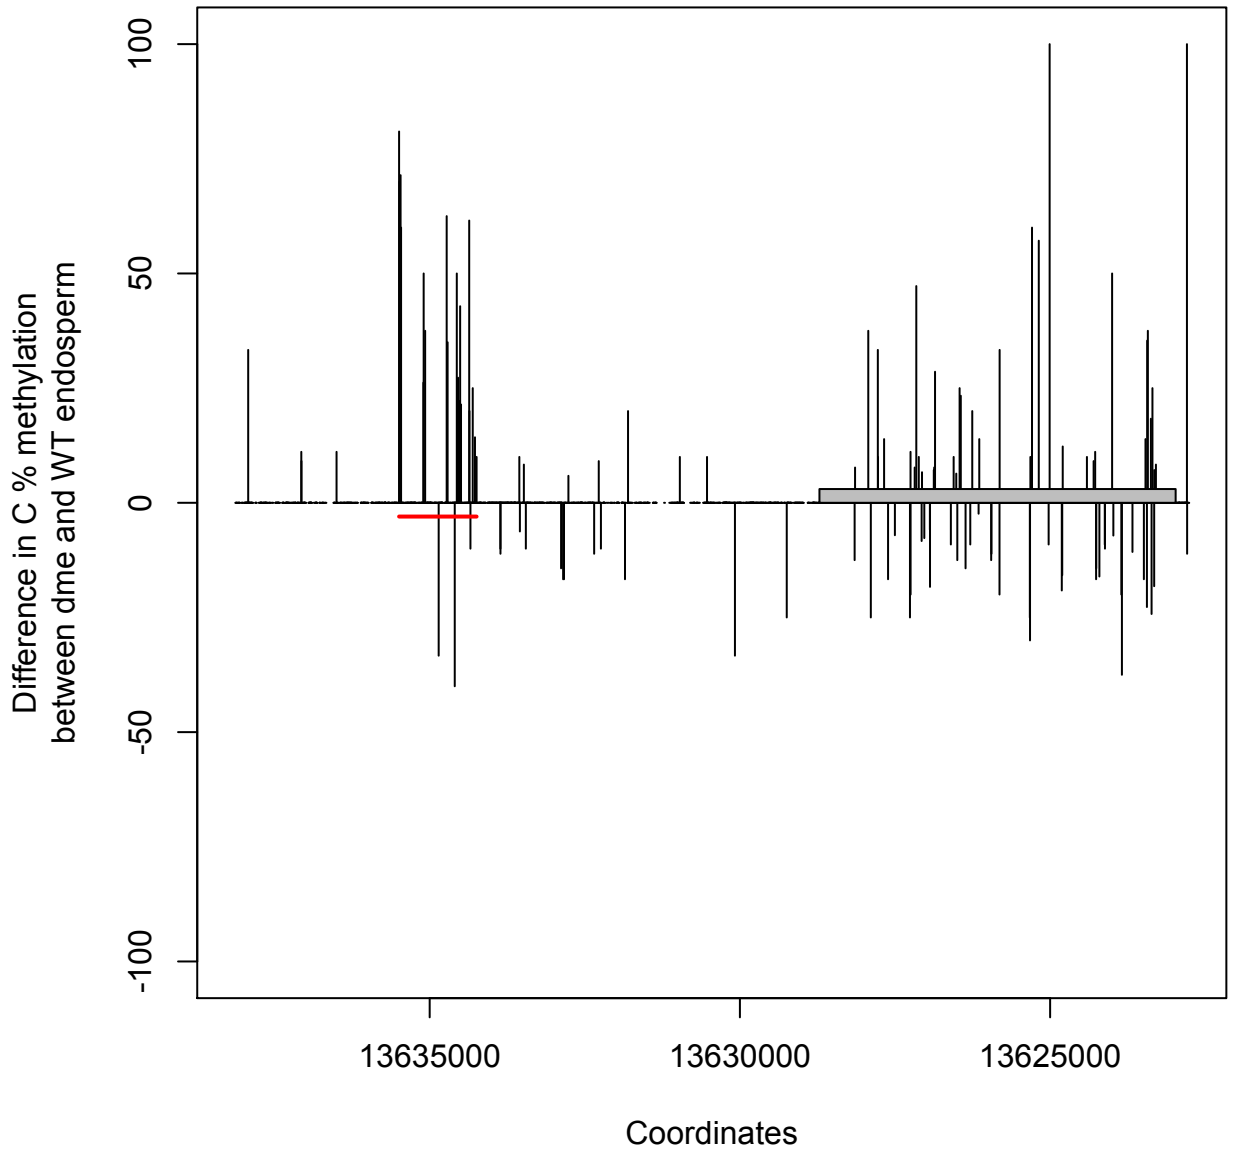

# AT3G17000

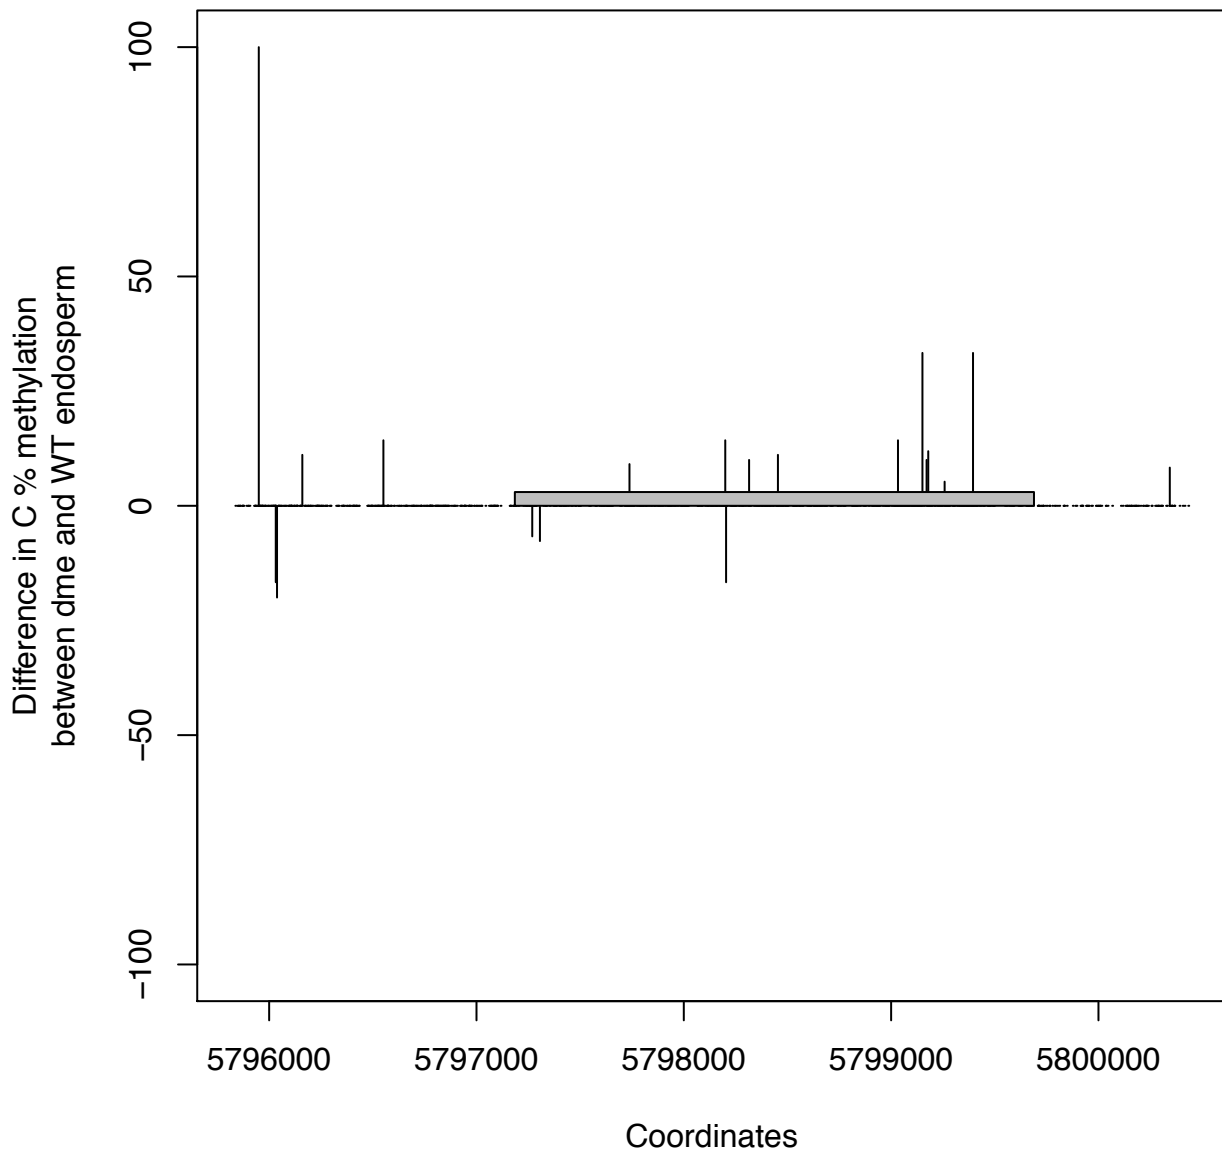

# AT3G24530

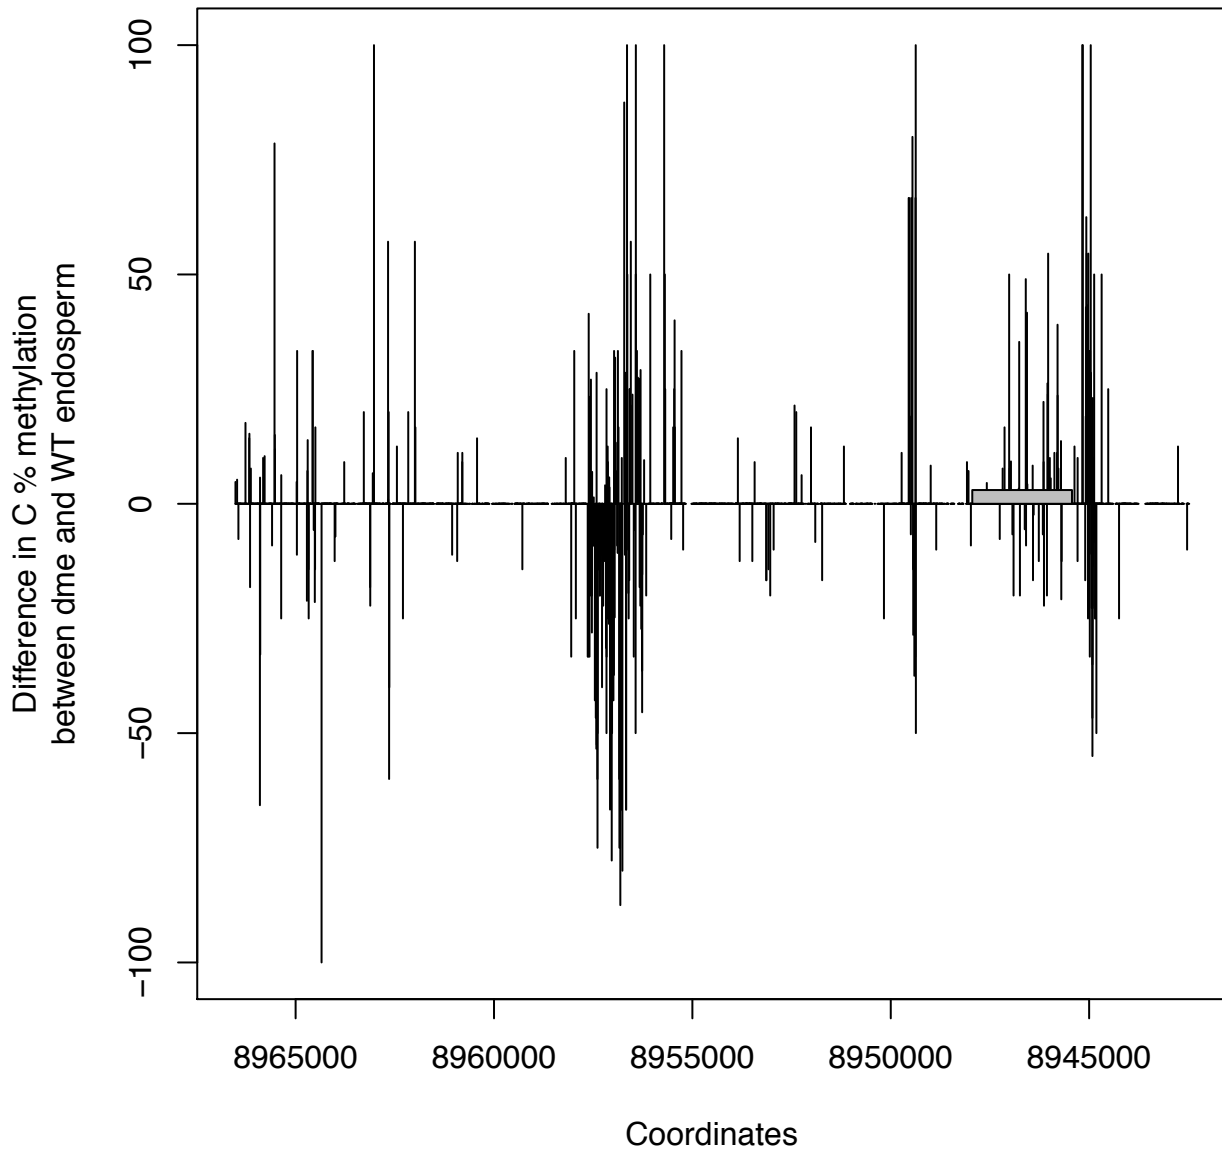

# AT3G55250

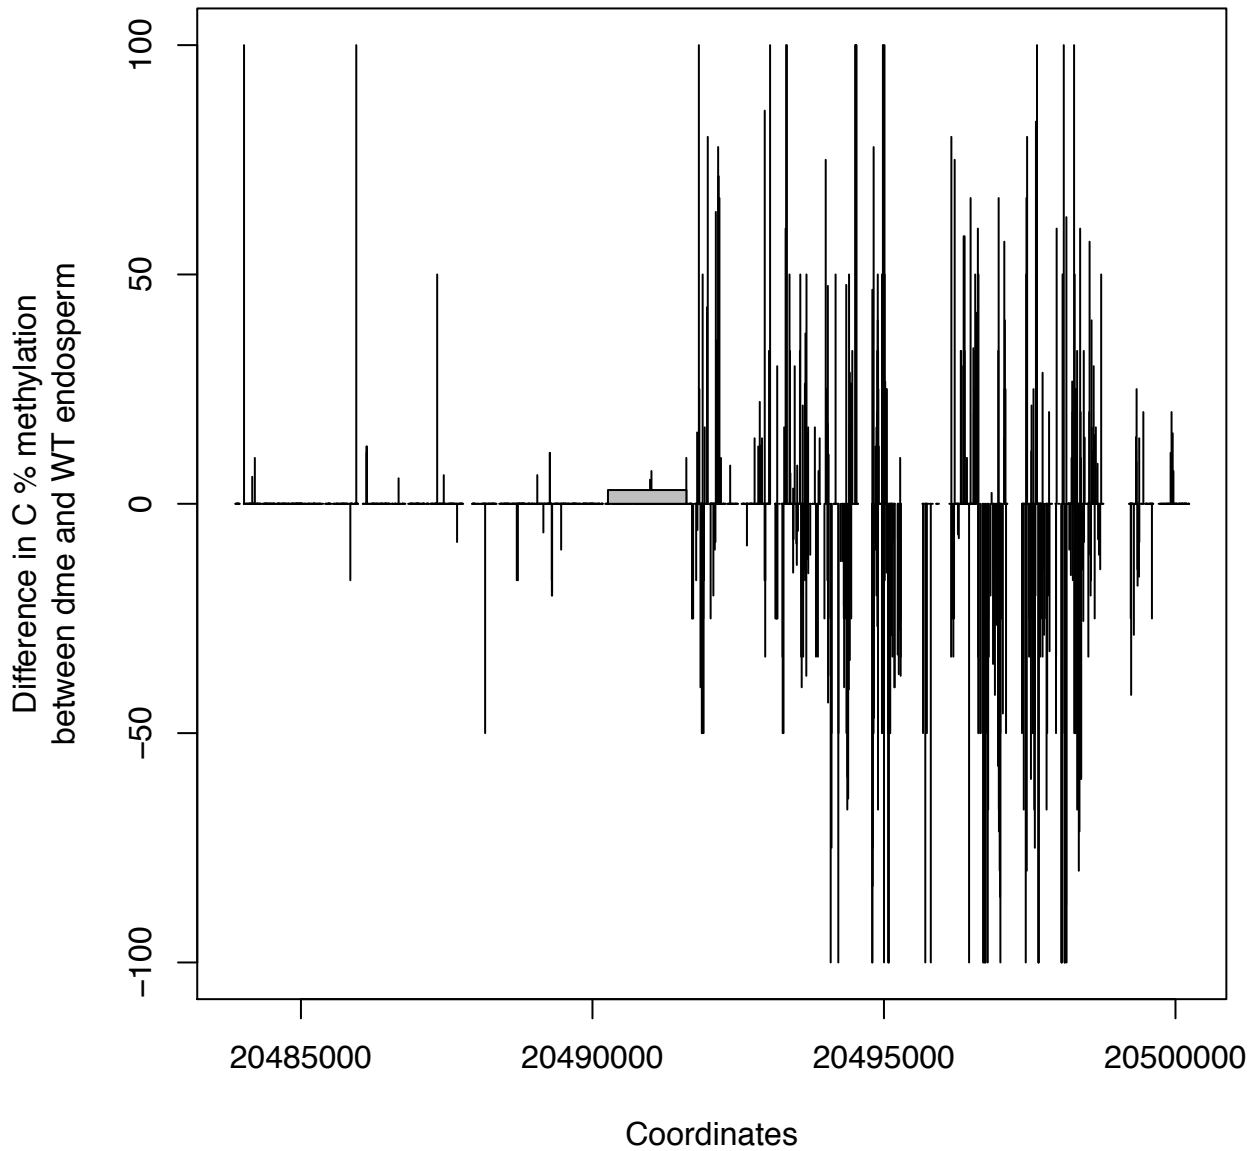

# AT3G59380

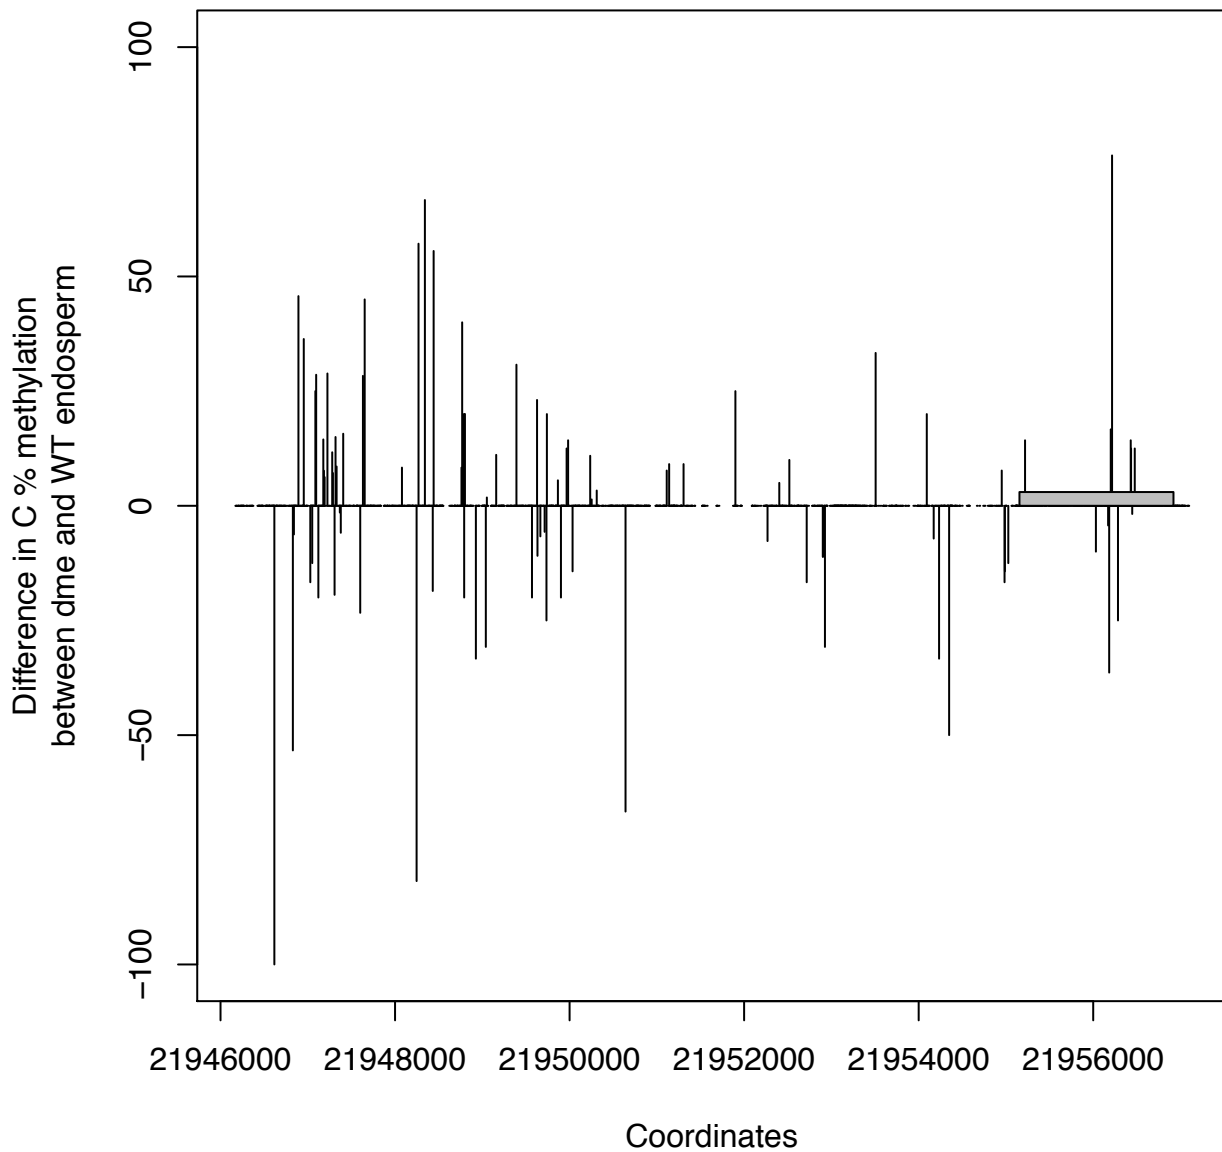

# AT4G16830

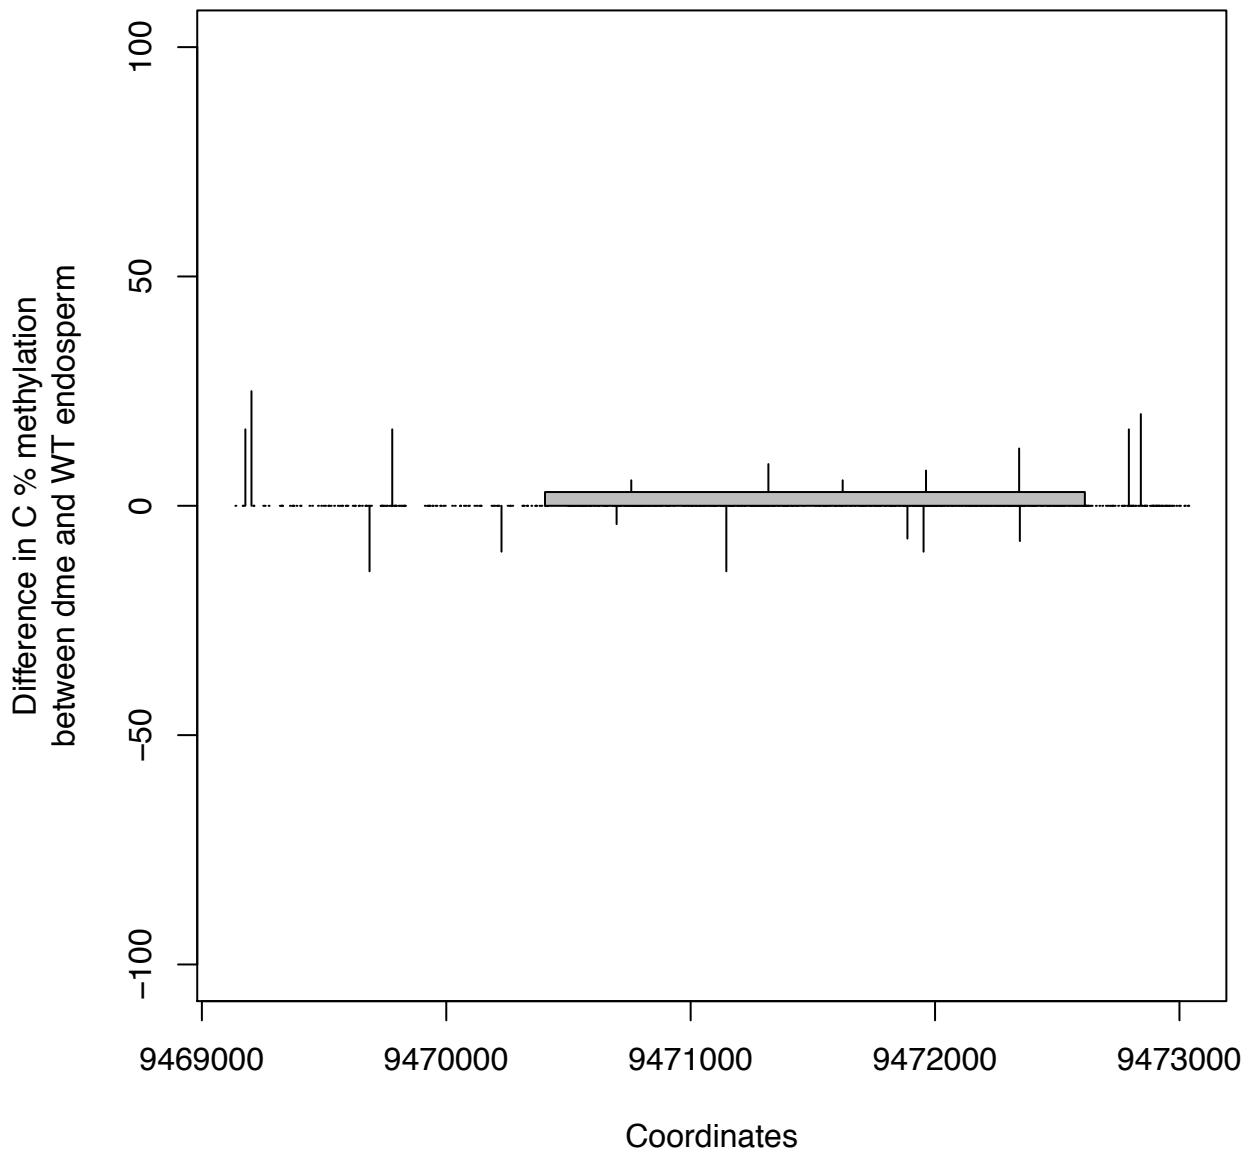

# AT5G39510

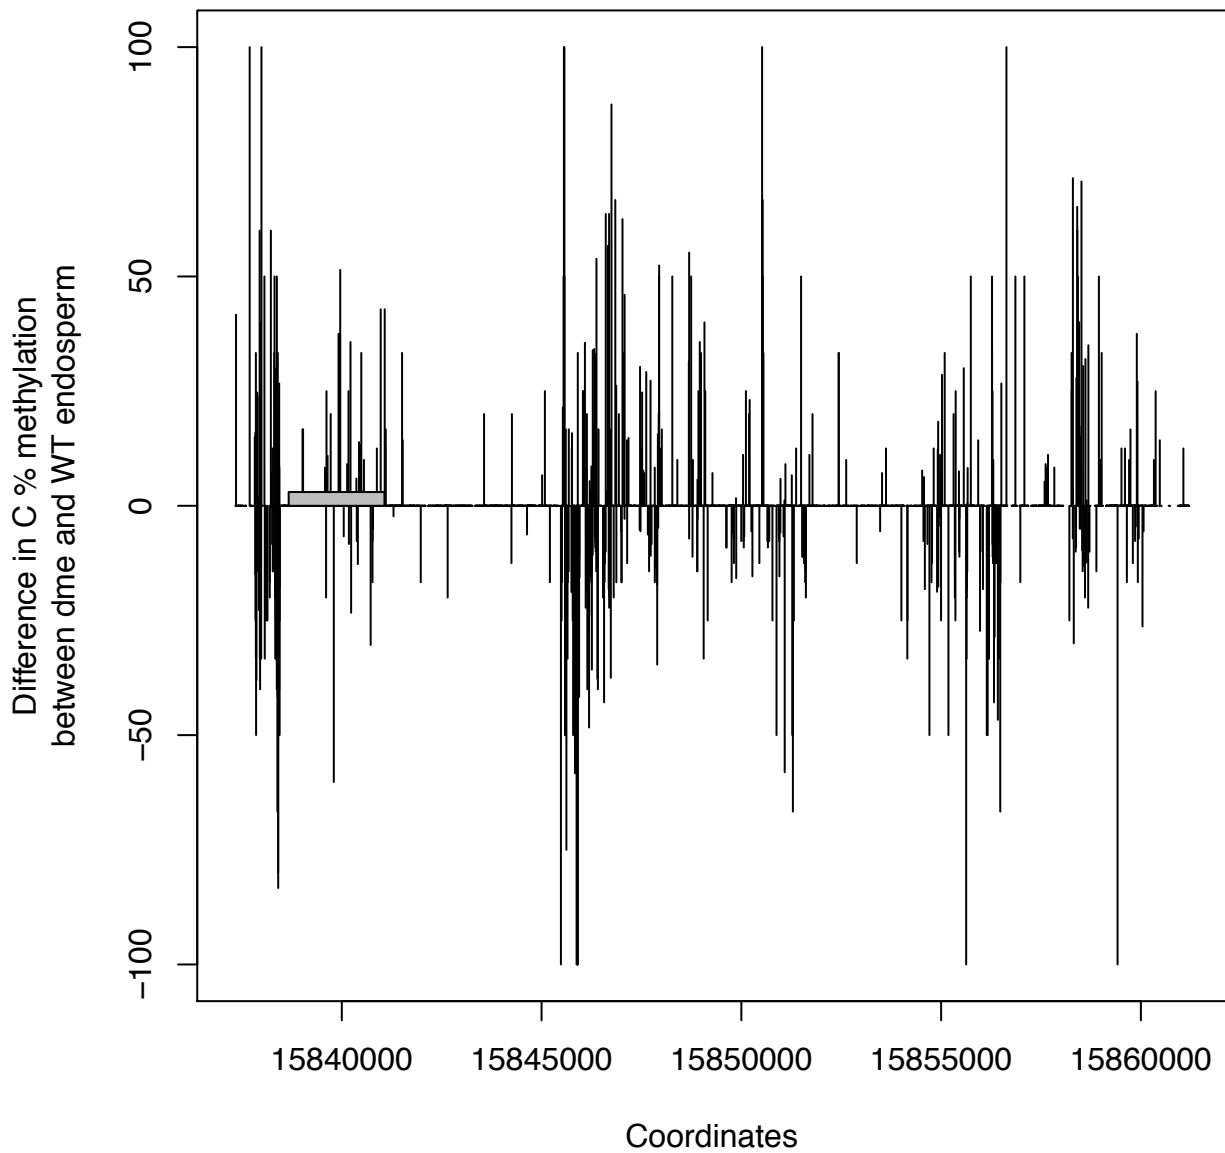

# AT5G63330

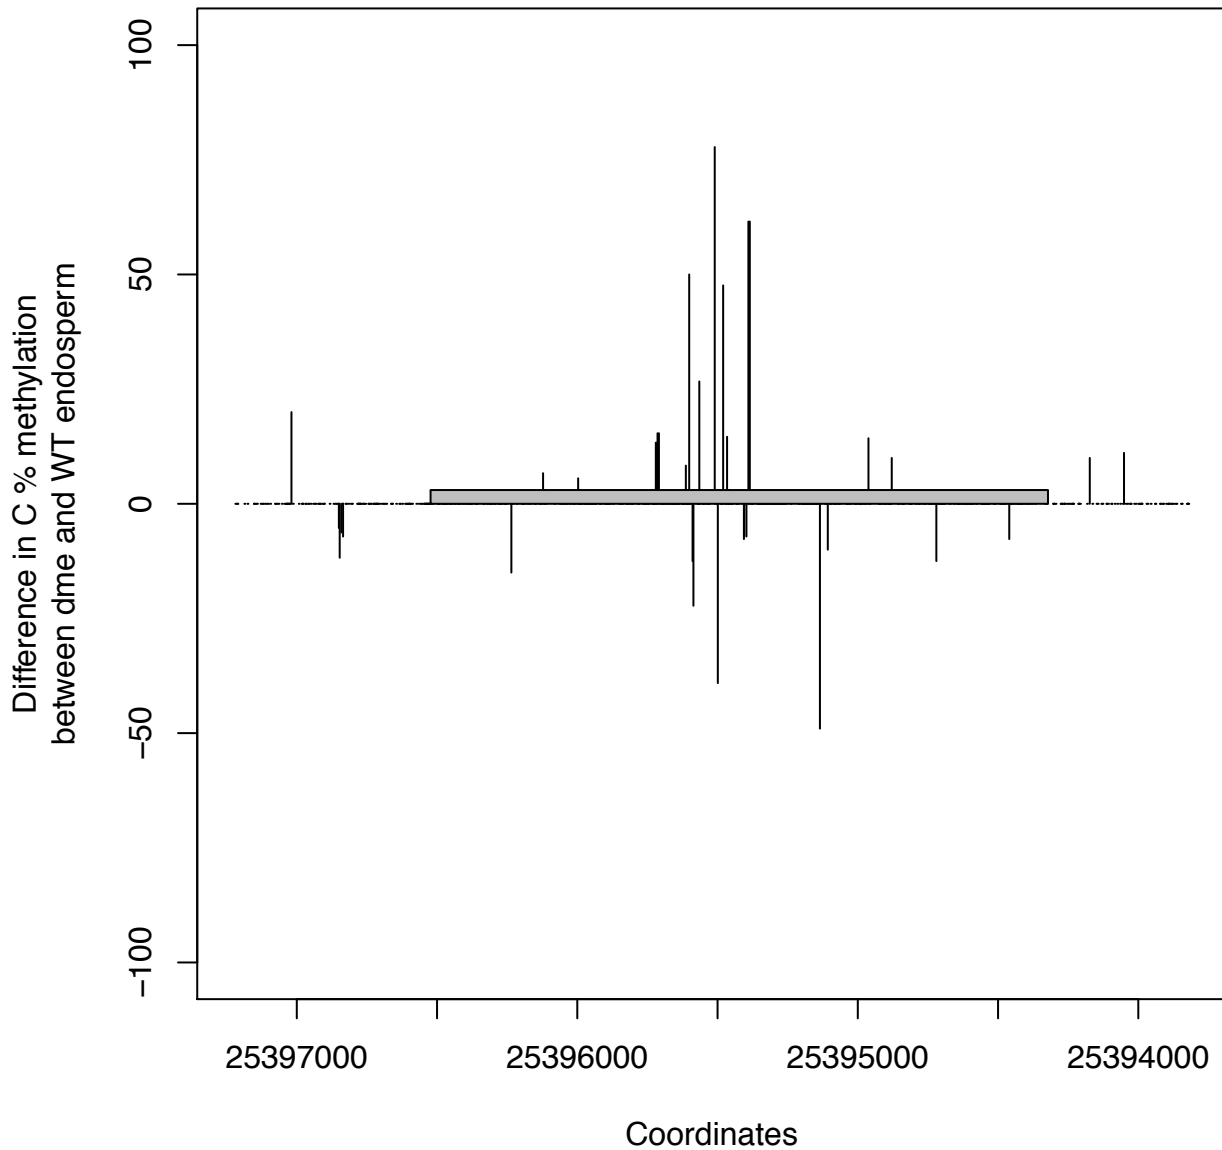

Supplement: Additional file 11 [file 1471-2229-11-113-s11.pdf]

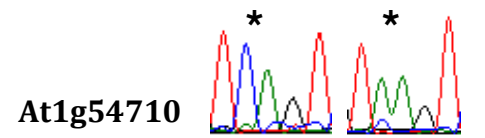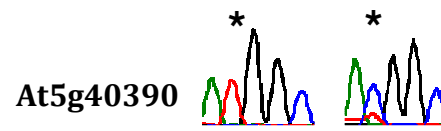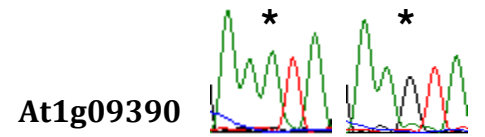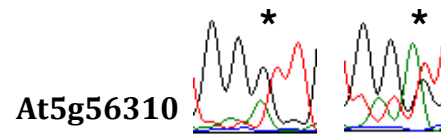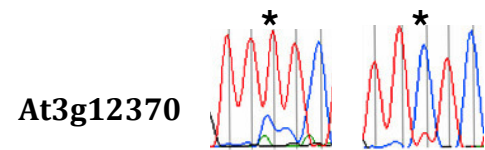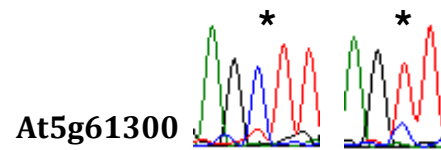

Supplement: Additional file 9 [file 1471-2229-11-113-s9.pdf]
